# Supplementary material for: Effects of Basic Amino Acids and Their Derivatives on SARS-CoV-2 and Influenza-A Virus Infection
Source: MDPI journal article supplement (doi:10.3390/v13071301), 2021-07-04
Supplement: s1 [file s1]

## Supplementary Figures

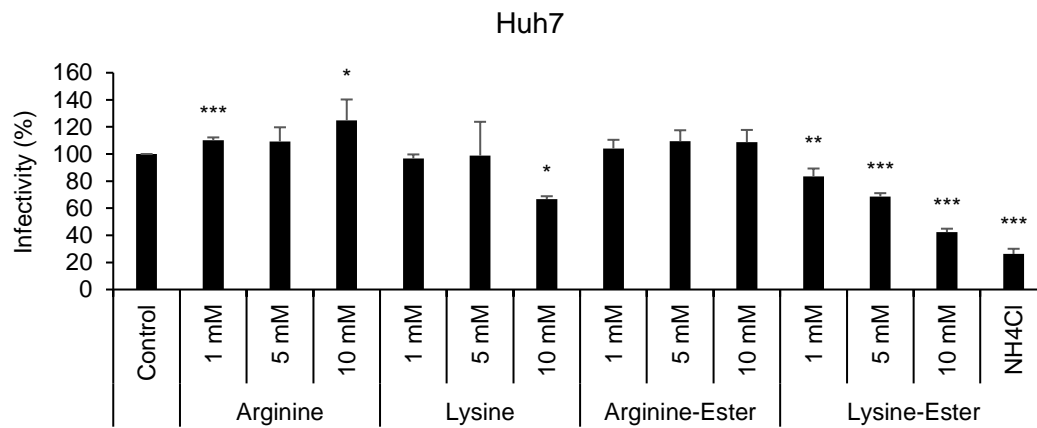

**Supplementary Figure S1.** Effect of compounds on SARS-CoV-2 Spike Vpp infection in Huh7 cells. Cells were pre-treated with different concentrations of the compounds for 1 h and transduced with Vpp for 24 h in the presence of the compounds in the media. Infectivity was measured using luciferase assay 3 days post infection. The values represent the means  $\pm$  standard deviation (SD) of data from three independent experiments.

\*,  $p < 0.05$ ; \*\*,  $p < 0.01$ ; and \*\*\*,  $p < 0.001$  compared with controls ( $n = 3$ ).

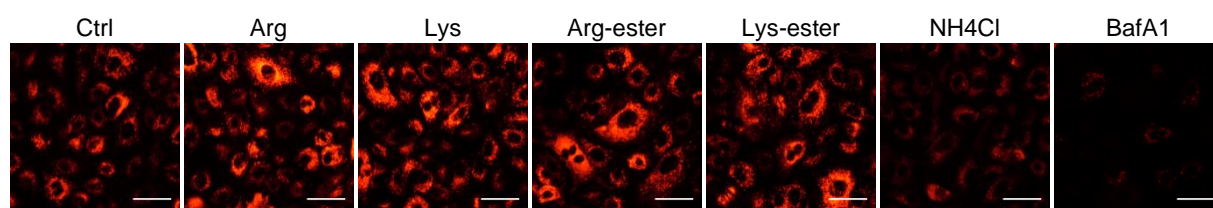

**Supplementary Figure S2.** LysoTracker Red staining of A549 cells following compound treatment for 1 h. Cells were treated with the compounds (10 mM), NH<sub>4</sub>Cl (20 mM) or bafilomycin A1 (40 nM) for 1 h and stained with 75 nM LysoTracker Red for 15 min. Acidic vacuoles were observed using fluorescence microscopy. Scale bar = 50  $\mu$ M.
